# Supplementary material
Source: PubMed Central journal article supplement (PMC7878361)
Supplement: NIHMS1643810-supplement-Supp_Material.pdf [file NIHMS1643810-supplement-Supp_Material.pdf]

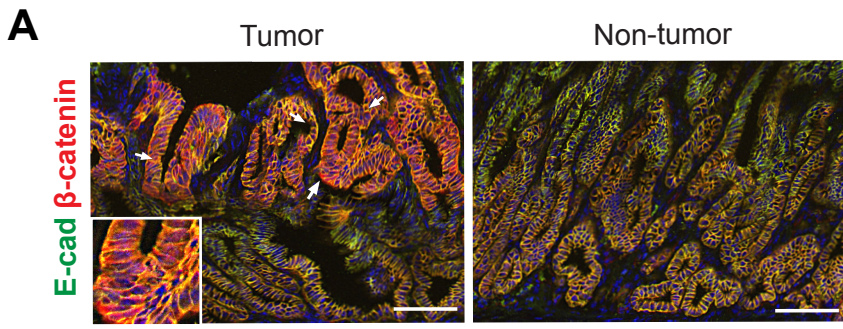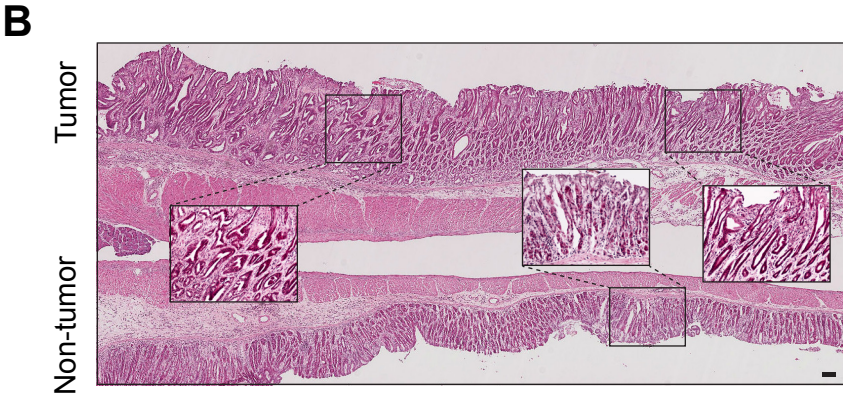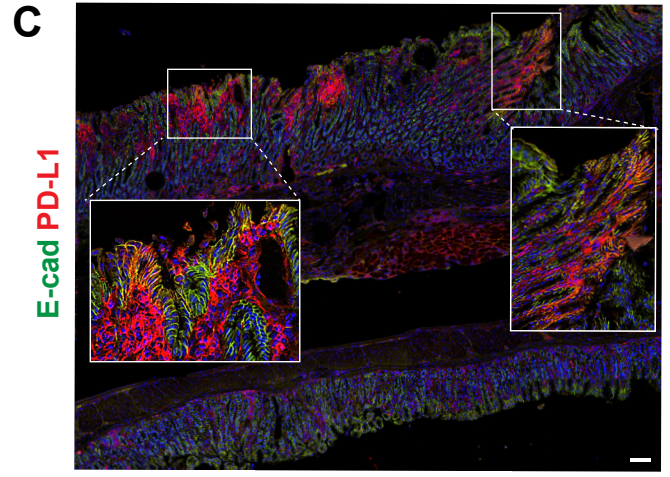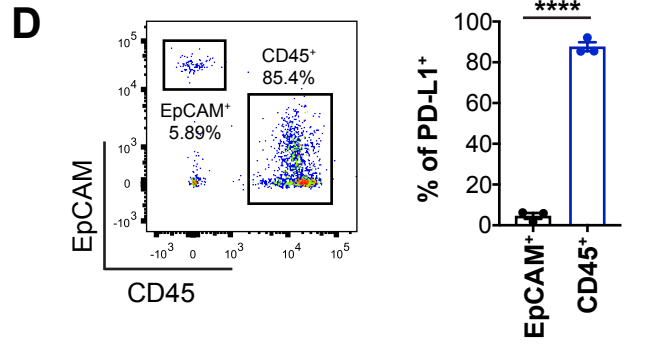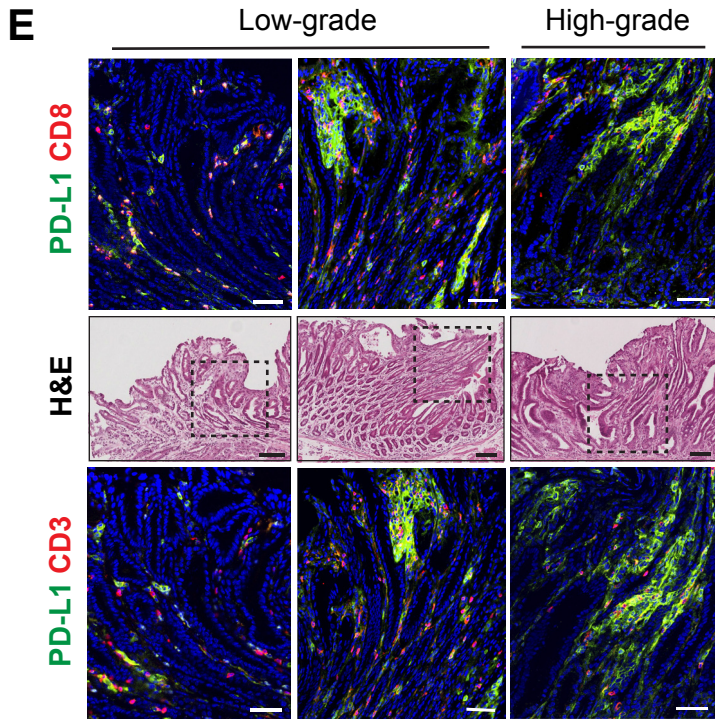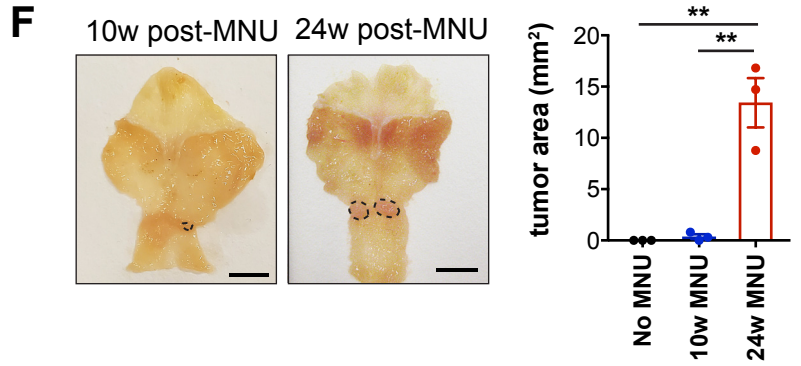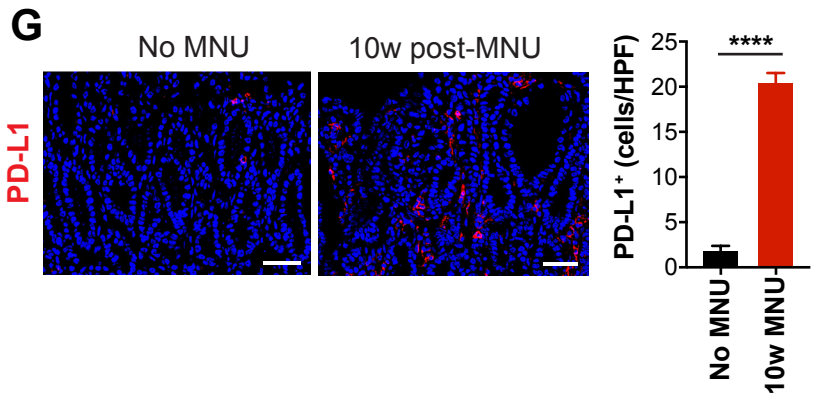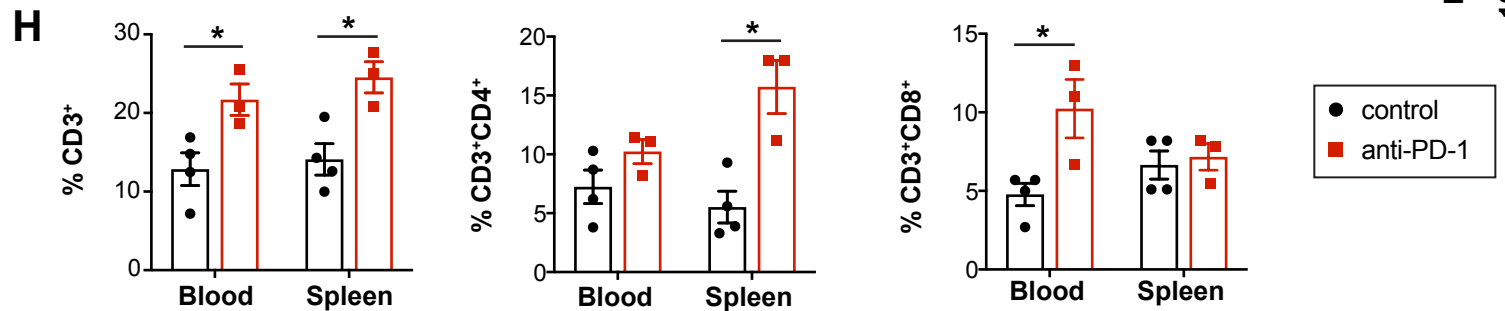

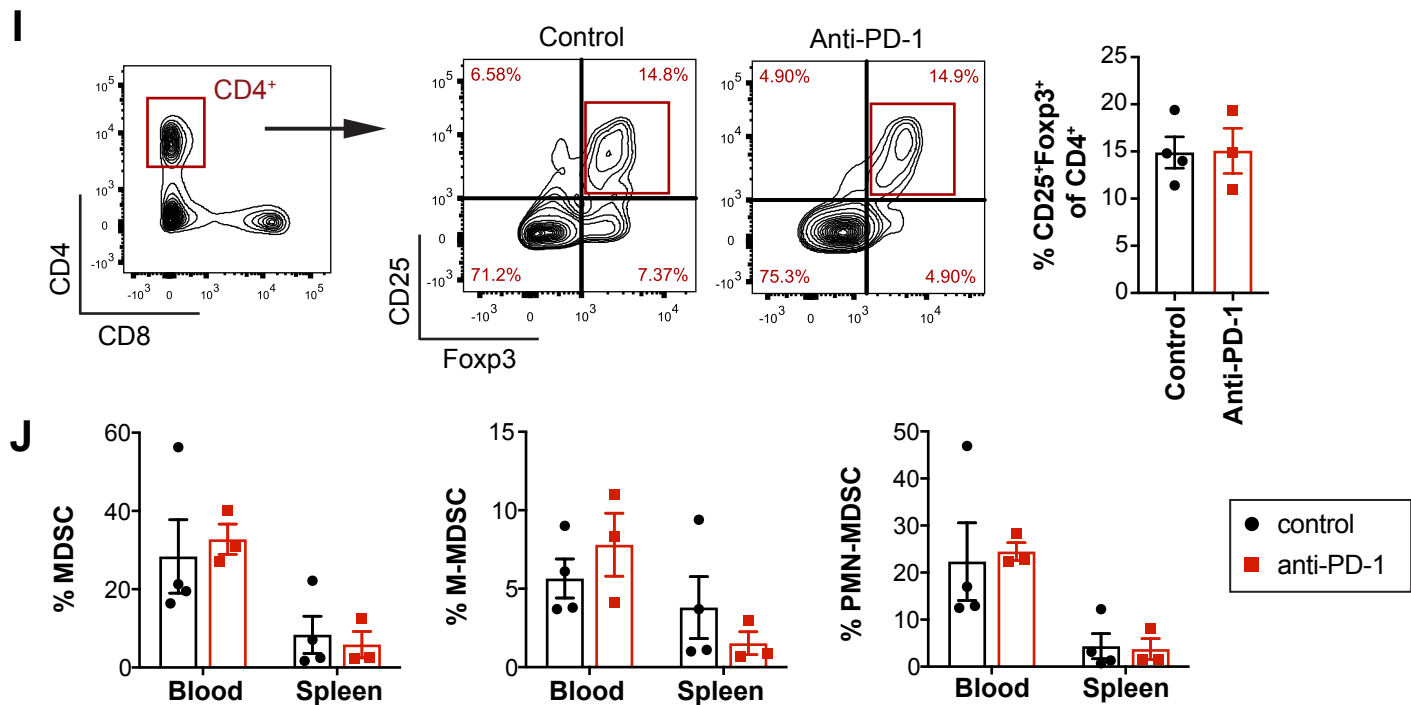

### Figure S1. Early treatment of PD-1 blockade in *Hfl/MNU/GAS-KO* mice

(A) Immunostaining for  $\beta$ -catenin and E-cadherin on gastric tissue from *Hfl/MNU*-induced *GAS-KO* mice at 30 weeks post-MNU. Arrows indicate nuclear  $\beta$ -catenin. Scale bar, 100  $\mu$ m.

(B) H&E stain of gastric tissue from *GAS-KO* mice at 30 weeks post-MNU. Scale bar, 100  $\mu$ m.

(C) Confocal microscopy image of gastric tissue stained for E-cadherin and PD-L1 in *GAS-KO* mice at 30 weeks post-MNU. Scale bar, 100  $\mu$ m.

(D) Flow cytometric analysis of the percentage of PD-L1<sup>+</sup> cells in EpCAM<sup>+</sup> epithelial cells and CD45<sup>+</sup> leukocytes isolated from *GAS-KO* tumors at 30 weeks post-MNU (n = 3).

(E) *Hfl/MNU/GAS-KO* tumors co-stained with PD-L1 and either CD3 or CD8 and corresponding H&E stains. Scale bar, 50  $\mu$ m for immunostaining; 100  $\mu$ m for H&E stain.

(F) Gross images and tumor area measured in *Hfl/MNU/GAS-KO* mice at 10 and 24 weeks post-MNU and control animals without *Hfl/MNU* induction (n = 3 per group). Dotted lines indicate tumor area.

(G) PD-L1 immunostaining on gastric tissues from *GAS-KO* mice at 10 weeks post-MNU and control animals without *Hfl/MNU* induction, and quantification of PD-L1<sup>+</sup> cells (n = 3/group).

(H) The percentage of CD3<sup>+</sup>, CD4<sup>+</sup> and CD8<sup>+</sup> T cells in the peripheral blood and spleen from *GAS-KO* mice treated with isotype control (n = 4) or anti-PD-1 (n = 3).

(I) Representative contour plots to gate CD4<sup>+</sup>CD25<sup>+</sup>Foxp3<sup>+</sup> Tregs in spleen and quantification of the percentage of CD25<sup>+</sup>Foxp3<sup>+</sup> cells in CD4<sup>+</sup> T cells from control (n = 4) and anti-PD-1-treated (n = 3) *GAS-KO* mice.

(J) The proportion of circulating and splenic MDSCs (CD11b<sup>+</sup>Gr-1<sup>+</sup>), M-MDSCs (CD11b<sup>+</sup>Ly6C<sup>hi</sup>Ly6G<sup>-</sup>) and PMN-MDSCs (CD11b<sup>+</sup>Ly6C<sup>lo</sup>Ly6G<sup>+</sup>) in *GAS-KO* mice treated with IgG control (n = 4) and anti-PD-1 (n = 3).

Data are represented as mean  $\pm$  SEM. Student's t-test. \**P* < .05; \*\**P* < .01; \*\*\*\**P* < .0001.

**A**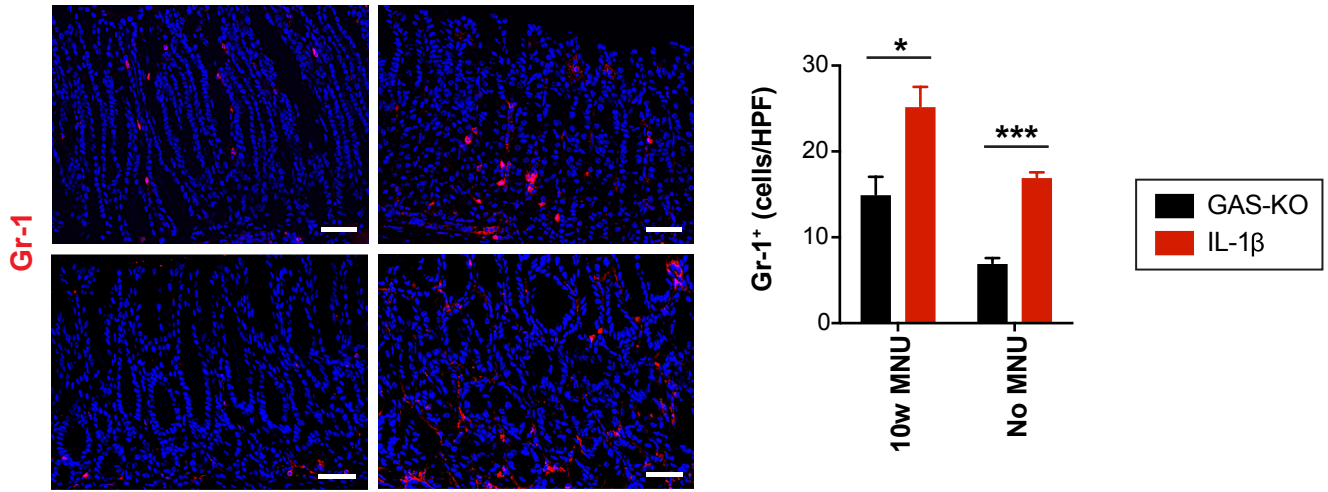**B**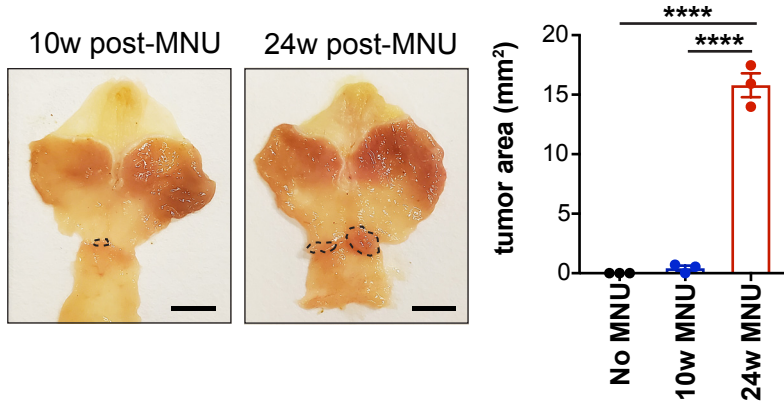**C**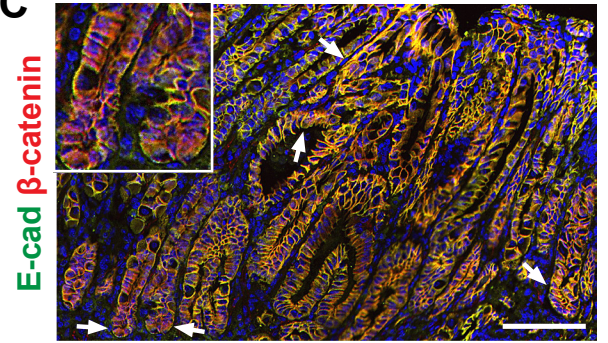**D**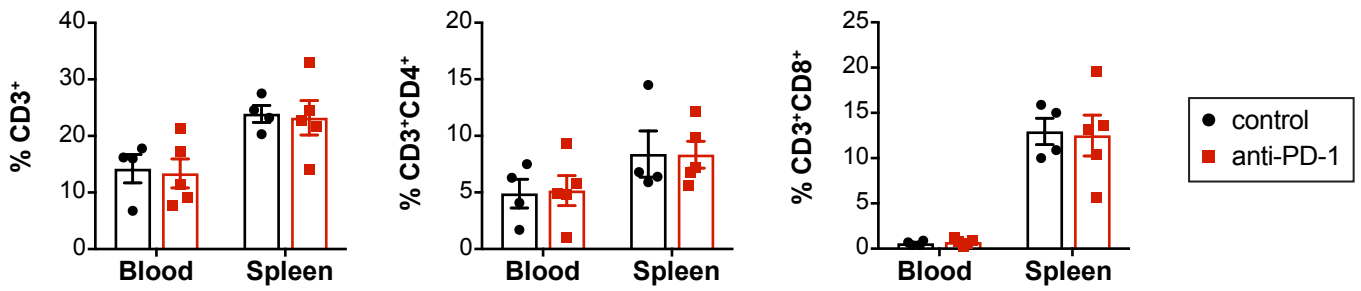**E**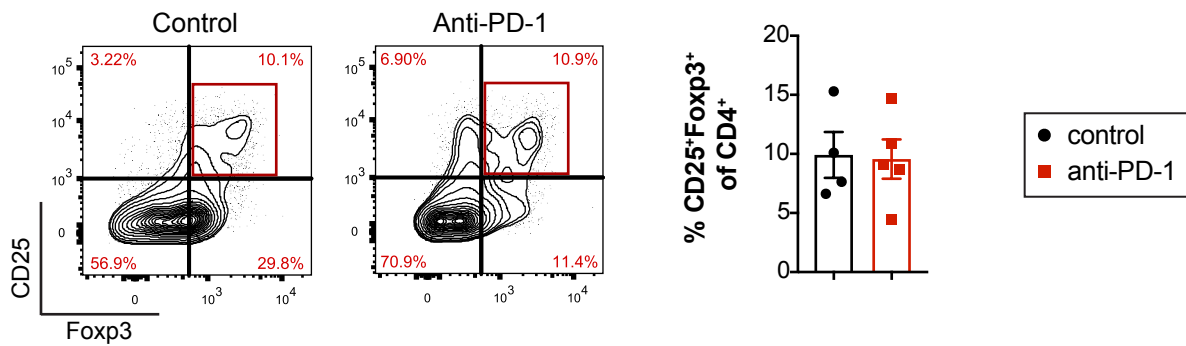**F**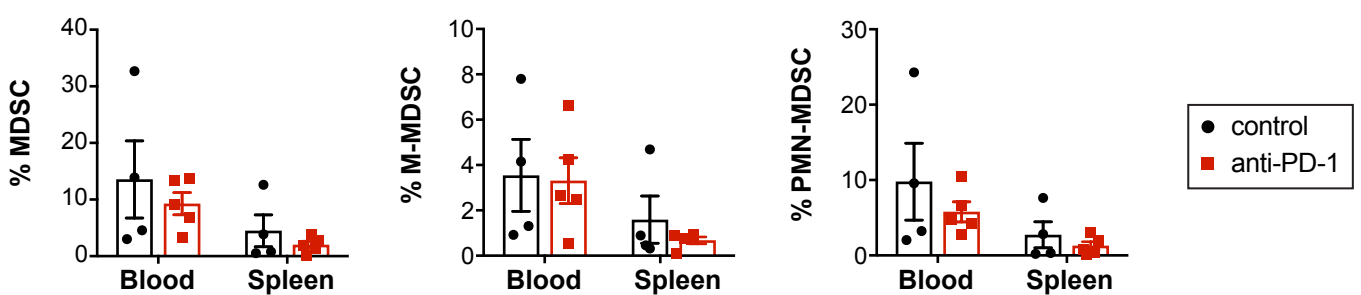

**Figure S2. H/K-ATPase-IL-1 $\beta$  mice with anti-PD-1 in the early treatment regimen**

(A) Gr-1 immunostaining on gastric tissues from *Hfl*/MNU-induced GAS-KO and IL-1 $\beta$  mice at 10 weeks post-MNU and control animals without *Hfl*/MNU, and quantification of Gr-1<sup>+</sup> cells.

(B) Gross images and tumor area measured in *Hfl*/MNU/IL-1 $\beta$  mice at 10 and 24 weeks post-MNU and control animals without *H. felis*/MNU induction (n = 3/group). Dotted lines indicate tumor area. Scale bars, 5 mm.

(C) Immunostaining for  $\beta$ -catenin and E-cadherin on *Hfl*/MNU/IL-1 $\beta$  tumors at 30 weeks post-MNU. Arrows indicate nuclear  $\beta$ -catenin. Scale bar, 100  $\mu$ m.

(D) The percentage of circulating and splenic total CD3<sup>+</sup> T cells and CD4<sup>+</sup> and CD8<sup>+</sup> T cell subsets in control (n = 4) and anti-PD-1-treated (n = 5) IL-1 $\beta$  mice.

(E) Representative contour plots showing CD25<sup>+</sup>Foxp3<sup>+</sup> cells gated on CD4<sup>+</sup> cells and quantification in splenic tissue from IL-1 $\beta$  mice following control (n = 4) and anti-PD-1 treatment (n = 5).

(F) The proportion of total MDSCs (CD11b<sup>+</sup>Gr-1<sup>+</sup>), M-MDSCs (CD11b<sup>+</sup>Ly6C<sup>hi</sup>Ly6G<sup>-</sup>), and PMN-MDSCs (CD11b<sup>+</sup>Ly6C<sup>lo</sup>Ly6G<sup>+</sup>) in the peripheral blood and spleen from control (n = 4) and anti-PD-1-treated (n = 5) IL-1 $\beta$  mice.

Data are represented as mean  $\pm$  SEM. Student's t-test. \* $P < .05$ ; \*\*\* $P < .001$ ; \*\*\*\* $P < .0001$ .

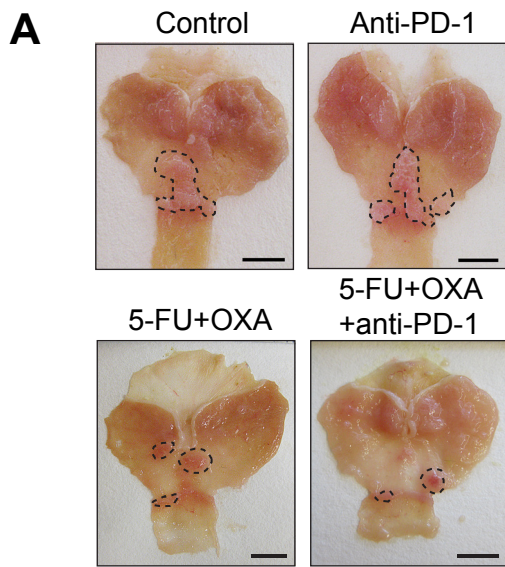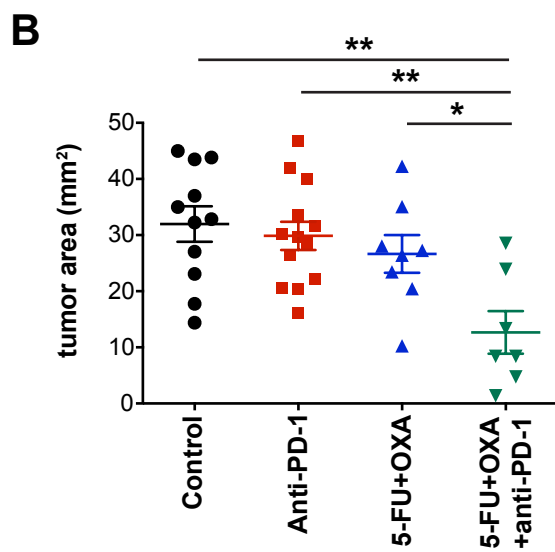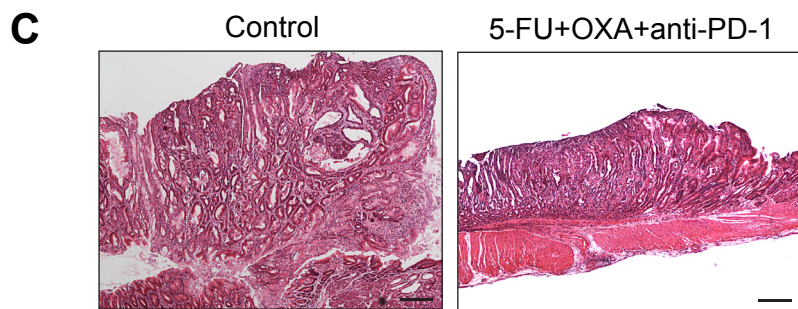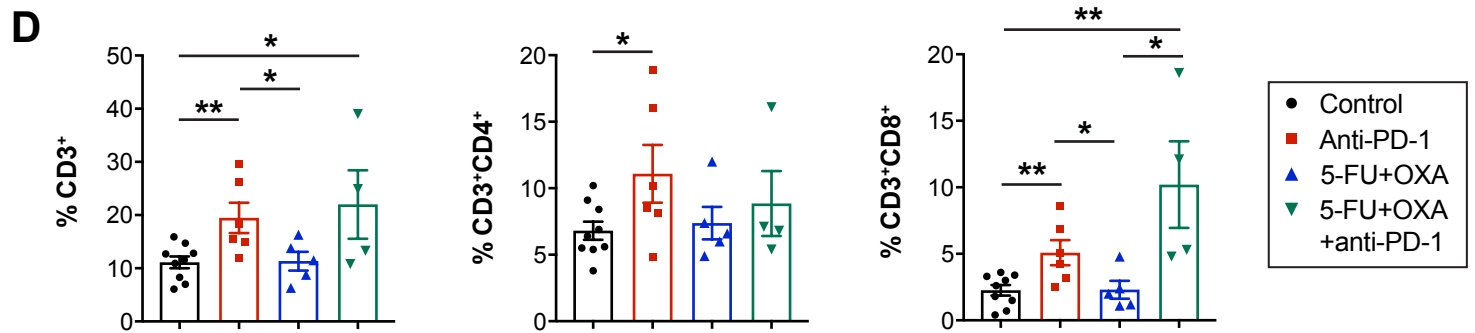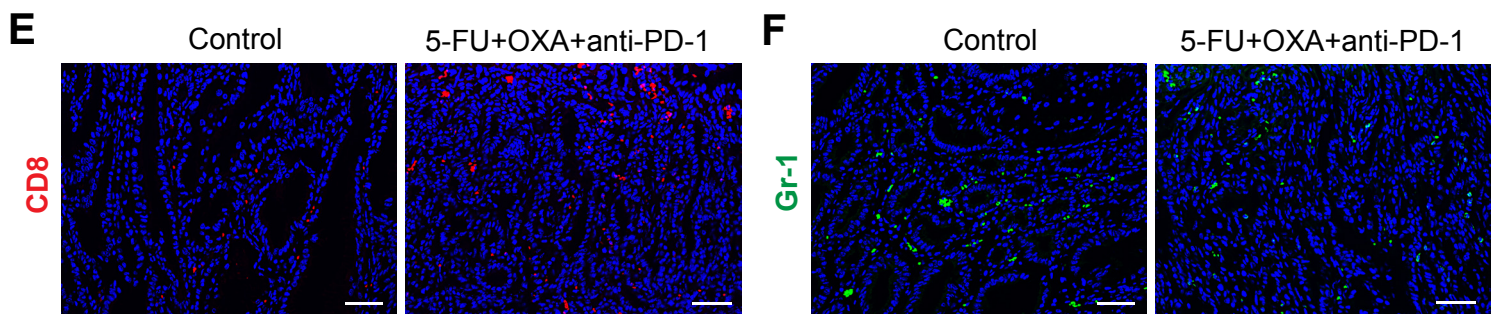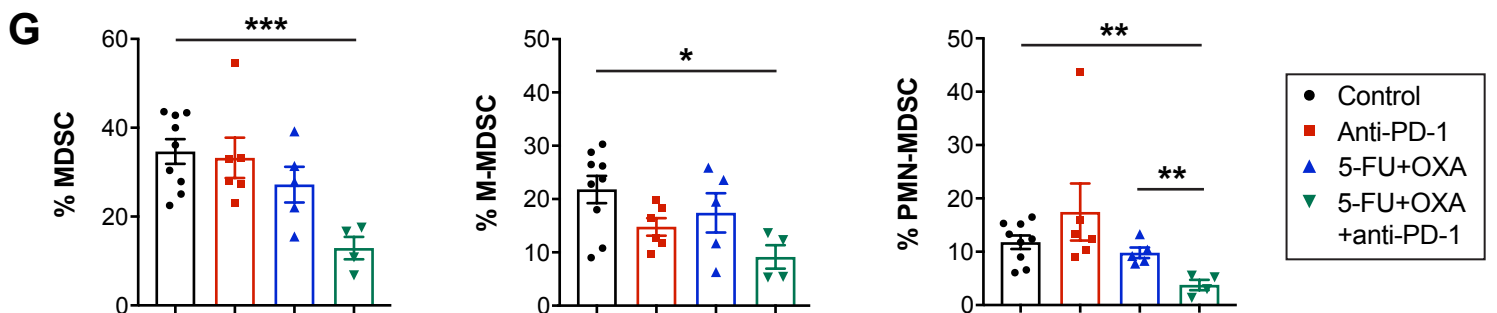

**Figure S3. Chemotherapy in combination with PD-1 blockade significantly decreases tumor burden in H/K-ATPase-IL-1 $\beta$  mice.**

(A-B) Gross images of gastric tissue (A) and tumor area measured (B) from IL-1 $\beta$  mice treated with isotype control (n = 11), anti-PD-1 alone (n = 13), chemotherapy (5-FU + OXA) alone (n = 8), and chemotherapy in combination with anti-PD-1 (n = 7). Scale bars, 5 mm (A). One-way ANOVA (B).

(C) H&E stains of IL-1 $\beta$  tumors treated with isotype control or combined anti-PD-1 with chemotherapy. Scale bars, 200  $\mu$ m.

(D) The percentage of tumor-infiltrating total CD3<sup>+</sup> T cells and CD4<sup>+</sup> and CD8<sup>+</sup> T cell subsets from IL-1 $\beta$  mice with control (n = 9), anti-PD-1 alone (n = 6), chemotherapy alone (n = 5), and combination treatment (n = 4). Student's t-test.

(E-F) Immunofluorescence staining for CD8 (E) and Gr-1(F) on IL-1 $\beta$  tumors treated with isotype control or combined anti-PD-1 with chemotherapy. Scale bars, 50  $\mu$ m.

(G) The percentage of total MDSCs, M-MDSCs, and PMN-MDSCs in IL-1 $\beta$  tumors treated as indicated. Student's t-test.

Data are represented as mean  $\pm$  SEM. \* $P$  < .05; \*\* $P$  < .01; \*\*\* $P$  < .001.

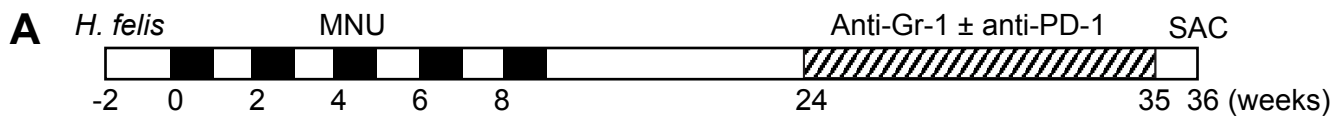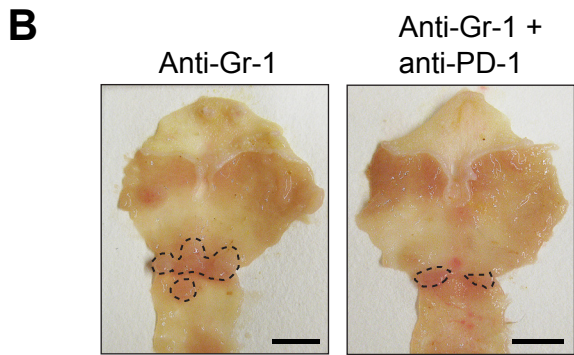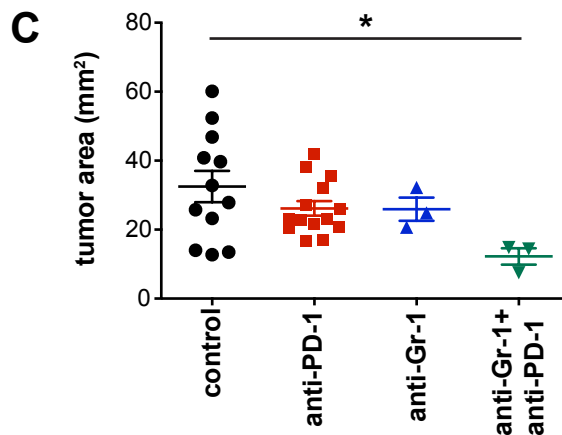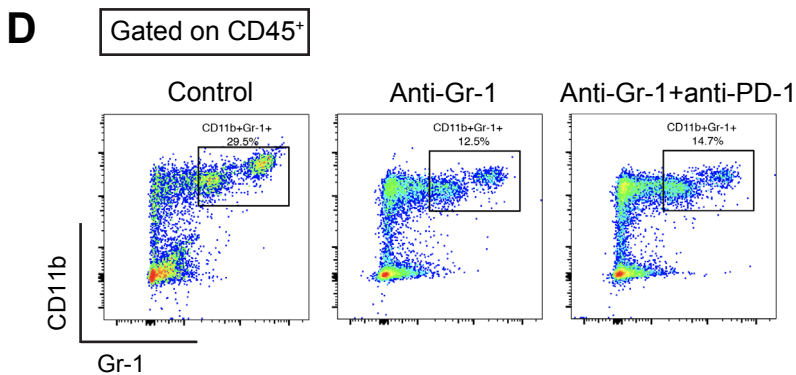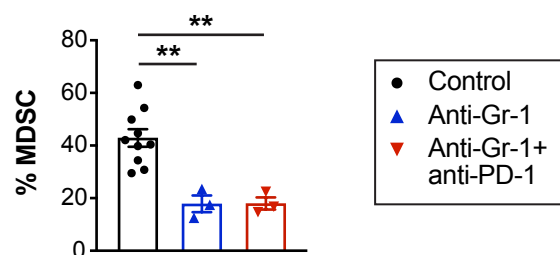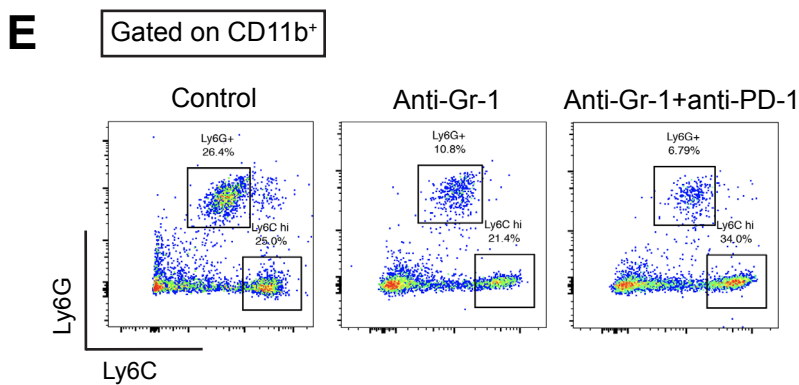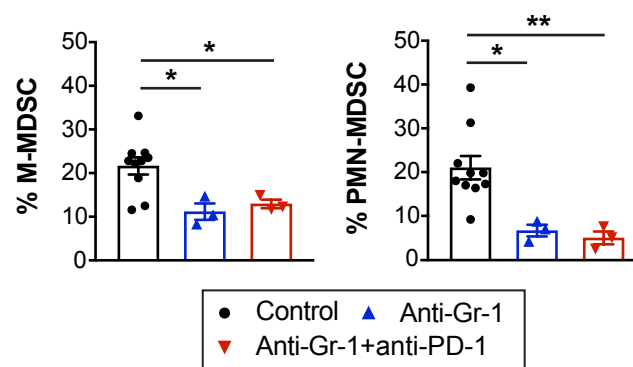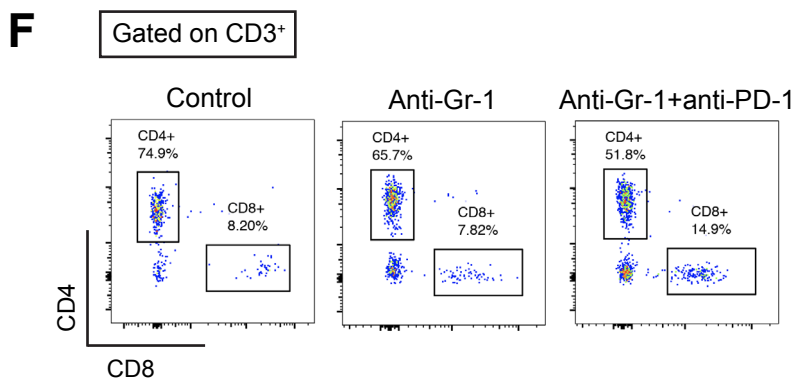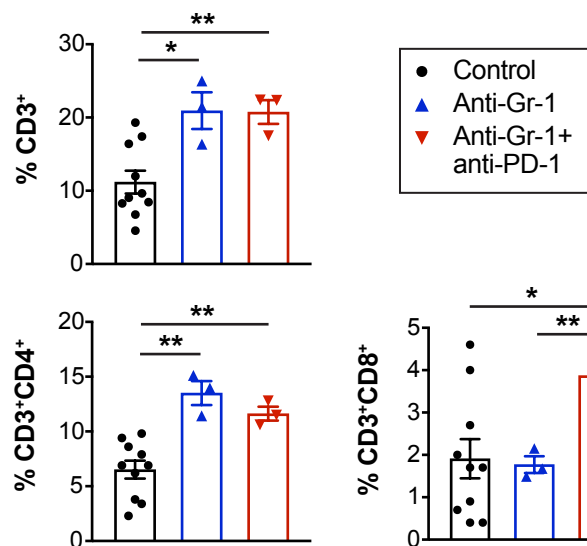

**Figure S4. The combination of anti-Gr-1 and anti-PD-1 inhibits gastric tumor growth in GAS-KO mice**

(A) Experimental scheme depicting induction of gastric cancer by *Hfl*/MNU and treatment with anti-Gr-1 in combination with anti-PD-1.

(B) Gross findings of GAS-KO mice treated with anti-Gr-1 alone or in combination with anti-PD-1. Scale bars, 5 mm.

(C) Measured tumor area from GAS-KO mice in the different treatment groups. Control and anti-PD-1 alone groups were previously shown in Figure 3C. Control (n = 12); anti-PD-1 alone (n = 14); anti-Gr-1 alone (n = 3); combination of anti-Gr-1 plus anti-PD-1 (n = 3). One-way ANOVA.

(D-F) Representative flow cytometry plots and quantification showing the percentage of MDSCs (D), MDSC subsets (E), and T cells (F) among CD45<sup>+</sup> cells in GAS-KO tumors treated with isotype control, anti-Gr-1 alone or anti-Gr-1 plus anti-PD-1 combination treatment. Student's t-test.

Data are represented as mean ± SEM. \**P* < .05; \*\**P* < .01.



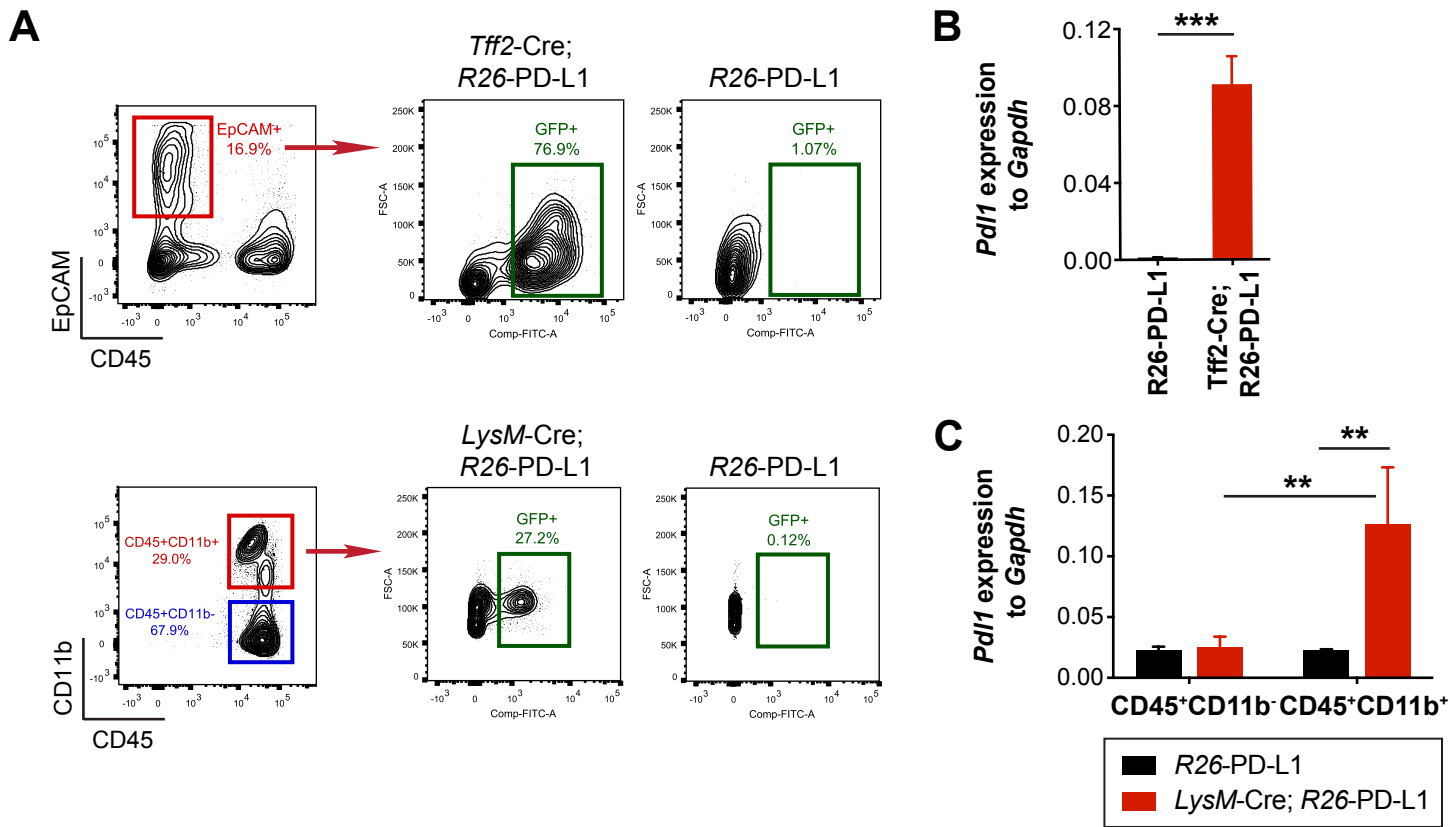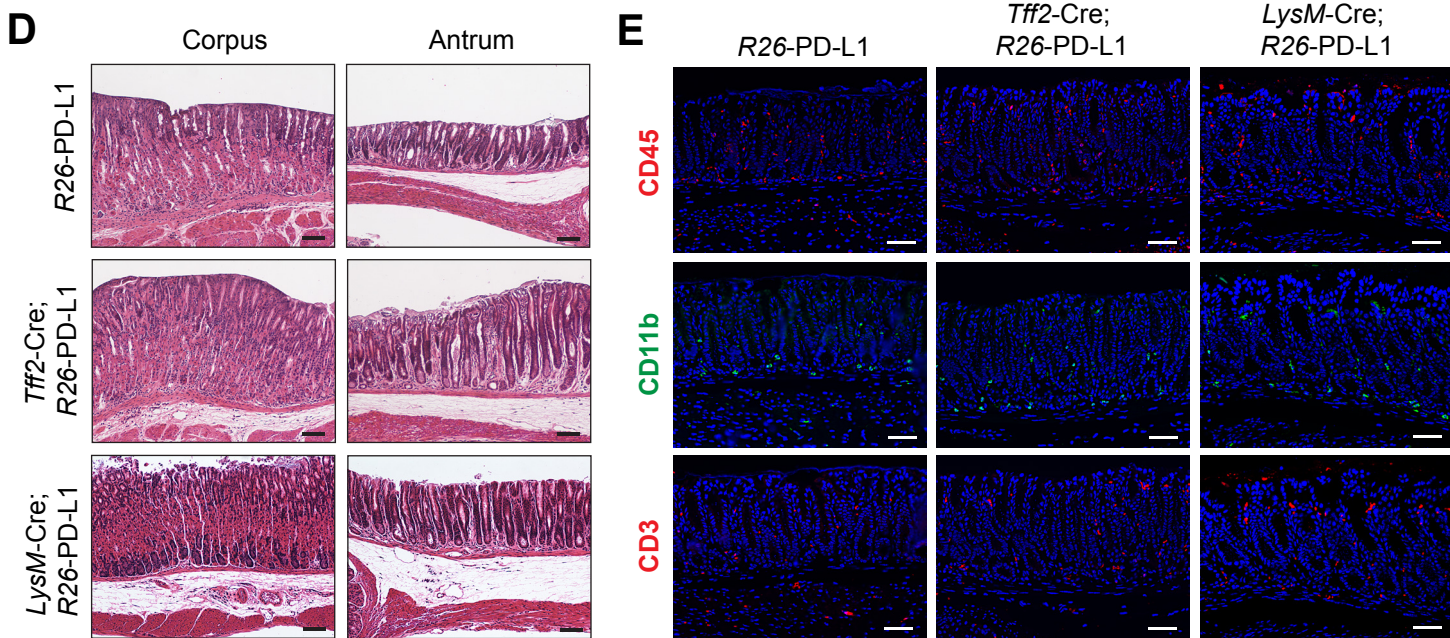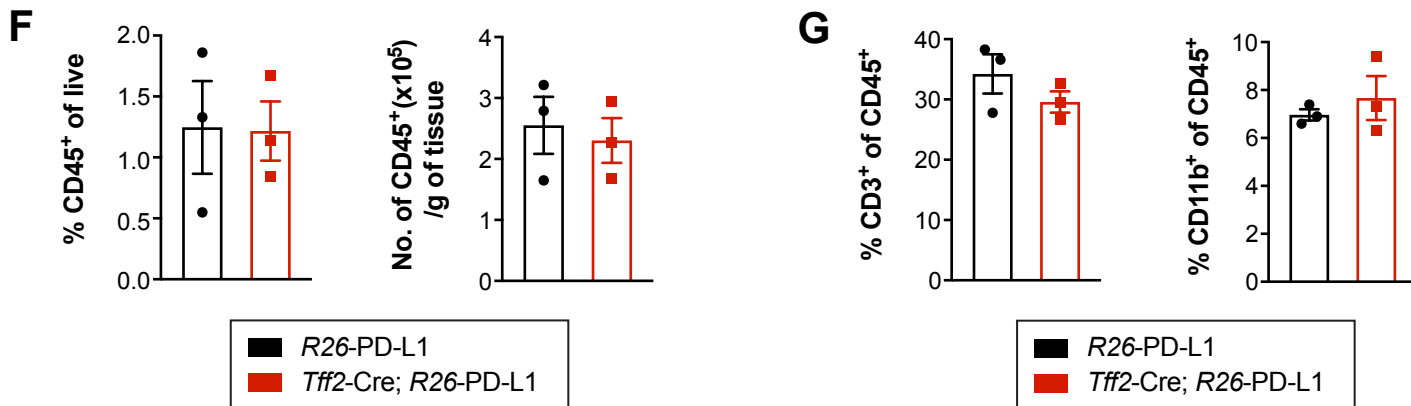

### Figure S5. Generation of *R26-LSL-Pdl1-EGFP* mice

(A) Representative gating and sorting strategy for isolation of epithelial and immune cells from antral tissues in *R26-PD-L1*, *Tff2-Cre*; *R26-PD-L1*, and *LysM-Cre*; *R26-PD-L1* mice.

(B-C) *Pdl1* gene expression by qPCR in EpCAM<sup>+</sup> cells isolated from antral tissues in *R26-PD-L1* and *Tff2-Cre*; *R26-PD-L1* mice (B) and in CD11b<sup>-</sup> and CD11b<sup>+</sup> cells isolated from splenic tissues in *R26-PD-L1* and *LysM-Cre*; *R26-PD-L1* mice (n = 3/group).

(D) H&E stains of gastric tissues from *R26-PD-L1*, *Tff2-Cre*; *R26-PD-L1*, and *LysM-Cre*; *R26-PD-L1* mice at 56 weeks of age. Scale bars, 100  $\mu$ m.

(E) Immunostaining for CD45, CD11b, and CD3 on gastric tissues from *R26-PD-L1*, *Tff2-Cre*; *R26-PD-L1* and *LysM-Cre*; *R26-PD-L1* mice at 56 weeks of age. Scale bars, 50  $\mu$ m.

(F) The proportion of CD45<sup>+</sup> cells in live cells and the absolute number of CD45<sup>+</sup> cells in antral tissues from 56-week-old *R26-PD-L1* and *Tff2-Cre*; *R26-PD-L1* mice (n = 3/group).

(G) The percentage of CD3<sup>+</sup> T cells and CD11b<sup>+</sup> myeloid cells among CD45<sup>+</sup> cells in antral tissues from 56-week-old *R26-PD-L1* and *Tff2-Cre*; *R26-PD-L1* mice (n = 3/group).

Data are represented as mean  $\pm$  SEM. Student's t-test. \*\**P* < .01; \*\*\**P* < .001.

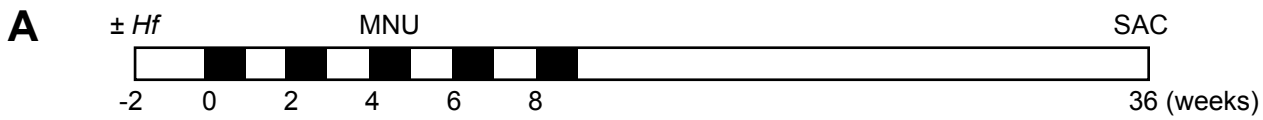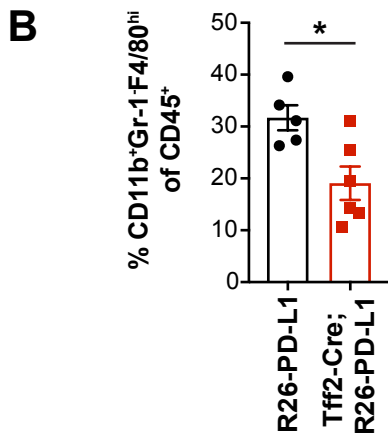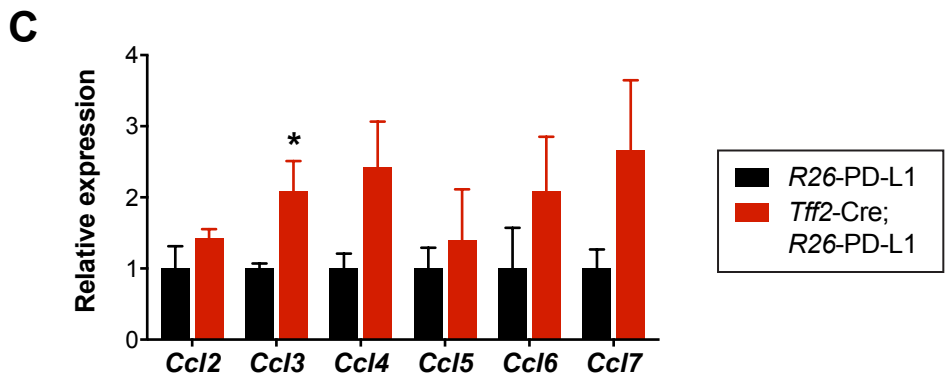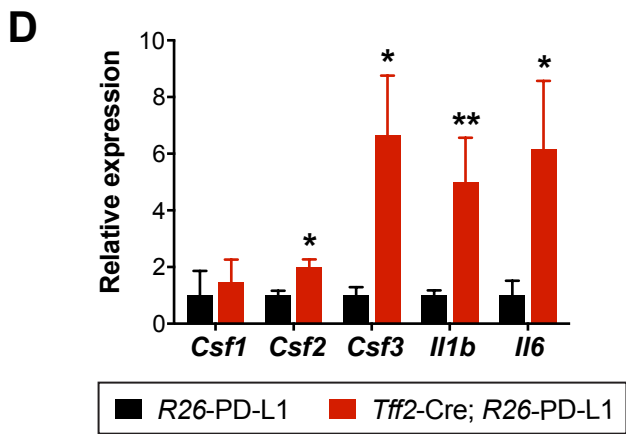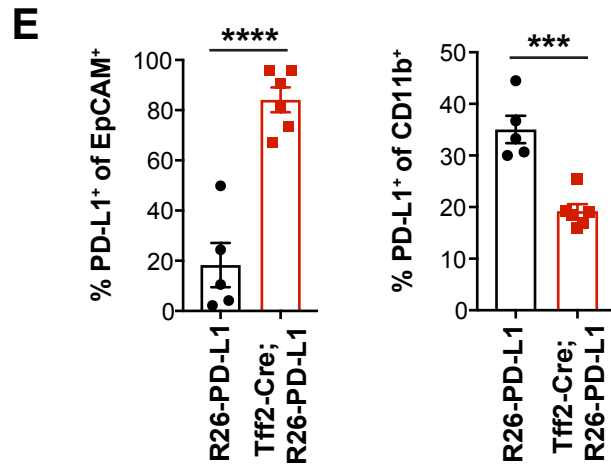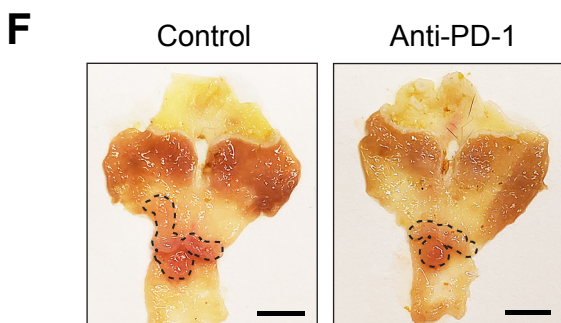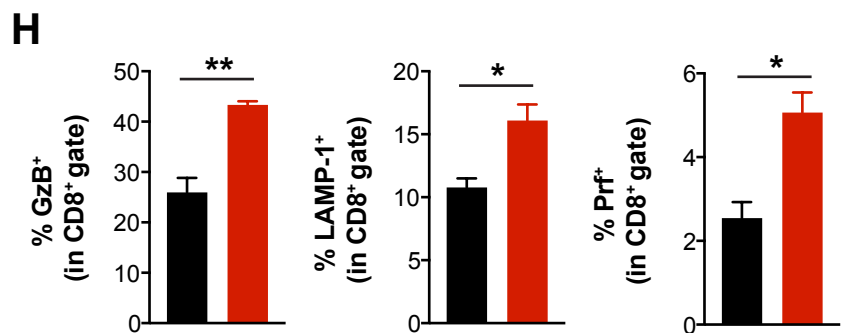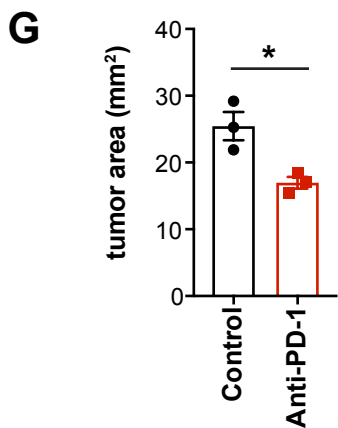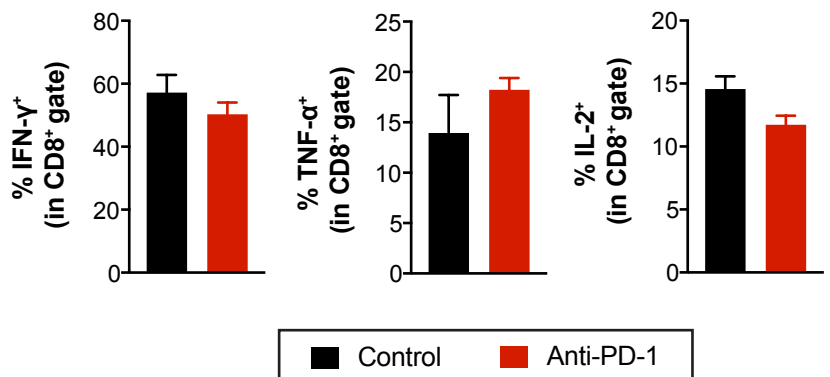

**Figure S6. Effects of PD-L1 overexpression in gastric epithelial cells on gastric tumorigenesis**

- (A) Experimental scheme depicting induction of gastric cancer in *R26*-PD-L1 control and Cre-expressing *R26*-PD-L1 mice with 5 cycles of MNU with or without *Helicobacter* infection.
- (B) The percentage of CD11b<sup>+</sup>Gr-1<sup>+</sup>F4/80<sup>+</sup> macrophages in tumors from *R26*-PD-L1 (n = 5) and *Tff2*-Cre; *R26*-PD-L1 mice (n = 6) by flow cytometry.
- (C-D) mRNA expression of chemokines (C) and growth factors/cytokines (D) in tumors from *R26*-PD-L1 and *Tff2*-Cre; *R26*-PD-L1 mice (n = 4/group).
- (E) The percentage of PD-L1<sup>+</sup> cells in EpCAM<sup>+</sup> epithelial cells and CD11b<sup>+</sup> myeloid cells isolated from tumors in *R26*-PD-L1 (n = 5) and *Tff2*-Cre; *R26*-PD-L1 (n = 6) mice.
- (F-G) Gross images (F) and tumor area measured (G) in *Tff2*-Cre; *R26*-PD-L1 mice treated with isotype control or anti-PD-1 at 24 weeks post-MNU for 6 weeks. Scale bars, 5 mm.
- (H) The percentage of GzB<sup>+</sup>, LAMP-1<sup>+</sup>, Prf<sup>+</sup>, IFN- $\gamma$ <sup>+</sup>, TNF- $\alpha$ <sup>+</sup>, and IL-2<sup>+</sup> cells in CD8<sup>+</sup> T cells isolated from *R26*-PD-L1 and *LysM*-Cre; *R26*-PD-L1 tumors (n = 3/group).
- Data are represented as mean  $\pm$  SEM. Student's t-test. \**P* < .05; \*\**P* < .01; \*\*\**P* < .001; \*\*\*\**P* < 0.0001.

**A**

|             |   | PD-L1         |               |                | Total          |
|-------------|---|---------------|---------------|----------------|----------------|
|             |   | CPS < 1       | 1 ≤ CPS < 10  | CPS ≥ 10       |                |
| CD11b score | 1 | 3<br>(10.7 %) | 0<br>(0 %)    | 2<br>(7.1 %)   | 5<br>(17.9 %)  |
|             | 2 | 4<br>(14.3 %) | 9<br>(32.1 %) | 6<br>(21.4 %)  | 19<br>(67.9 %) |
|             | 3 | 0<br>(0 %)    | 0<br>(0 %)    | 4<br>(14.3 %)  | 4<br>(14.3 %)  |
| Total       |   | 7<br>(25 %)   | 9<br>(32.1 %) | 12<br>(42.9 %) | 28<br>(100%)   |

\**P* = .0219 by Fisher's exact test

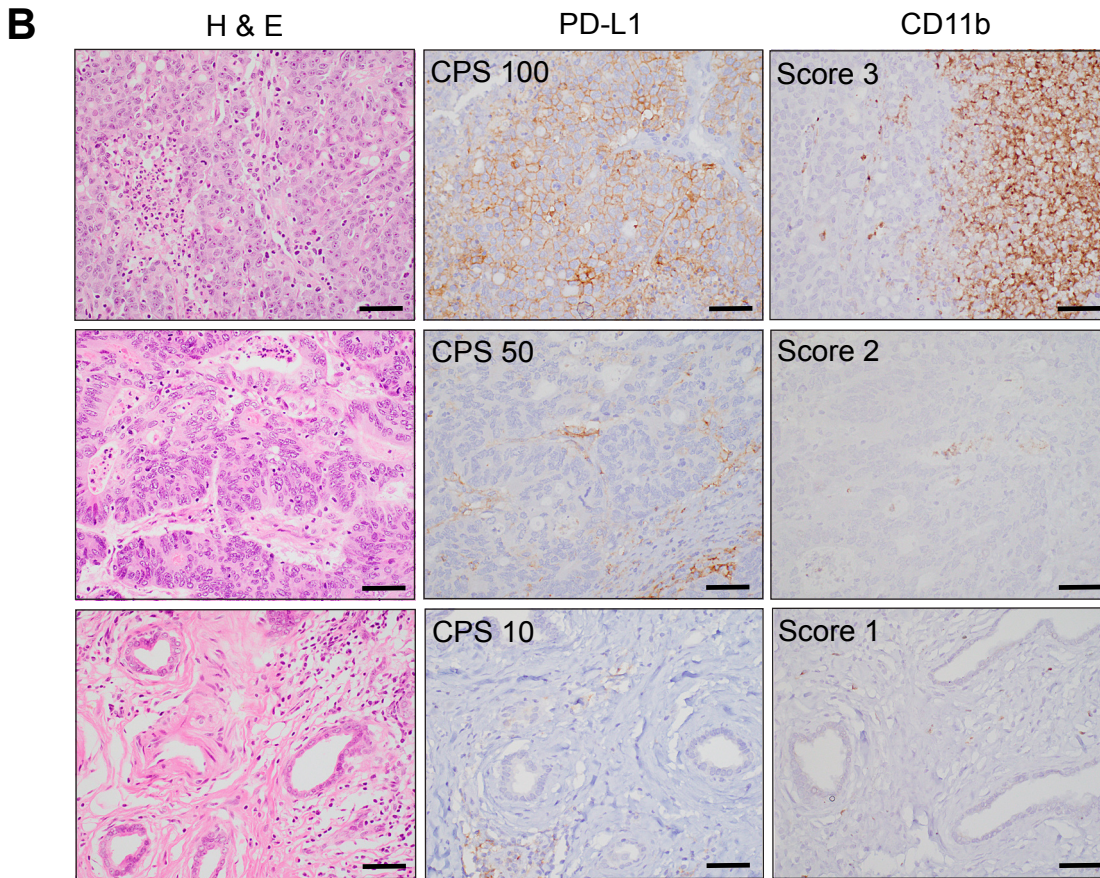

**Figure S7. Expression of PD-L1 and CD11b in human gastric cancers**

(A) Correlation between the expression levels of PD-L1 and CD11b in 28 human gastric cancer cases. Fisher's test. \**P* < .05.

(B) H&E, PD-L1, and CD11b staining in human gastric cancers. Scale bars, 50 μm.

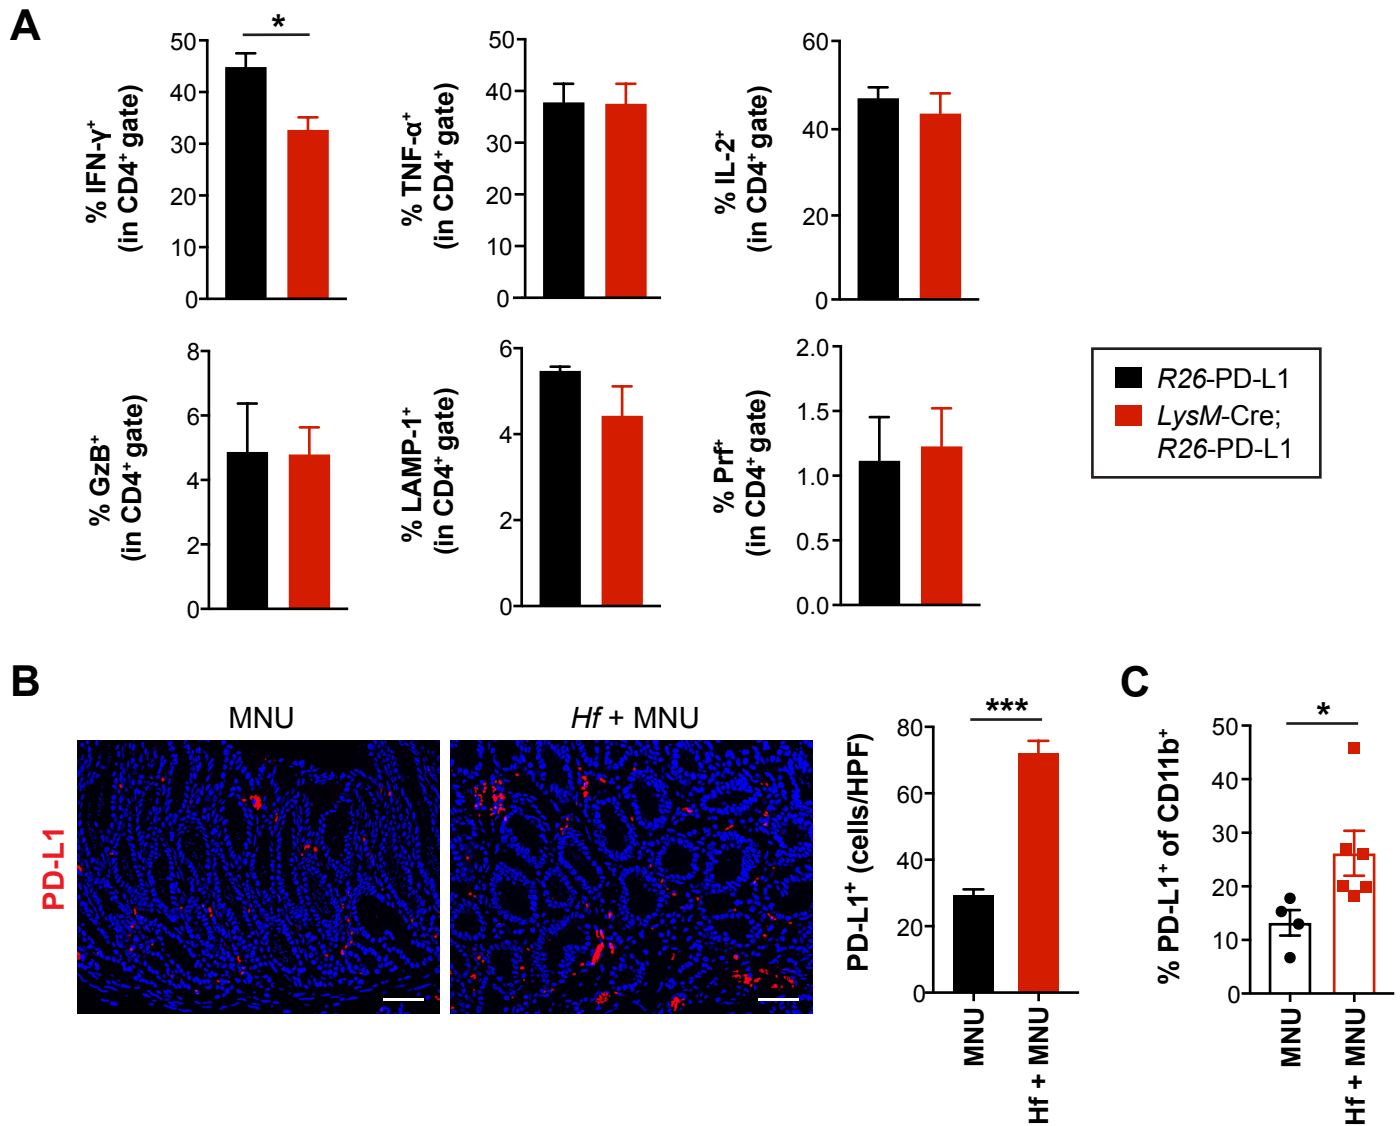

**Figure S8. Effects of PD-L1 overexpression in myeloid cells on gastric tumorigenesis**

(A) The percentage of IFN- $\gamma^+$ , TNF- $\alpha^+$ , IL-2 $^+$ , GzB $^+$ , LAMP-1 $^+$ , and Prf $^+$  cells in CD4 $^+$  T cells isolated from tumors in MNU-induced R26-PD-L1 and *LysM-Cre*; R26-PD-L1 mice (n = 3/group).

(B) Immunofluorescence staining for PD-L1 on R26-PD-L1 tumors induced with MNU alone or in combination with *Helicobacter* and quantification of PD-L1 $^+$  cells (n = 3/group).

(C) The percentage of PD-L1 $^+$  cells in tumor CD11b $^+$  myeloid cells from MNU (n = 4) or *Hfl*/MNU-induced (n = 6) R26-PD-L1 mice.

Data are represented as mean  $\pm$  SEM. Student's t-test. \* $P < .05$ ; \*\*\* $P < .001$ .
